# Supplementary material for: Lessons in Protein Design from Combined Evolution and Conformational Dynamics
Source: PubMed Central journal article supplement (PMC4585694; doi:10.1038/srep14259), 2015-09-21
Supplement: srep14259-s1.pdf [file srep14259-s1.pdf]

## **Supplementary Information**

### **Lessons in Protein Design from Combined Evolution and Conformational Dynamics**

Swarnendu Tripathi <sup>1,3</sup>, M. Neal Waxham <sup>2</sup>, Margaret S. Cheung\* <sup>1,3</sup>, and Yin Liu\* <sup>2</sup>

1. Department of Physics, University of Houston, Houston, TX

2. Department of Neurobiology and Anatomy, University of Texas, Health Science Center,  
Houston, TX

3. Center for Theoretical Biological Physics, Rice University, Houston, TX

\*Corresponding authors

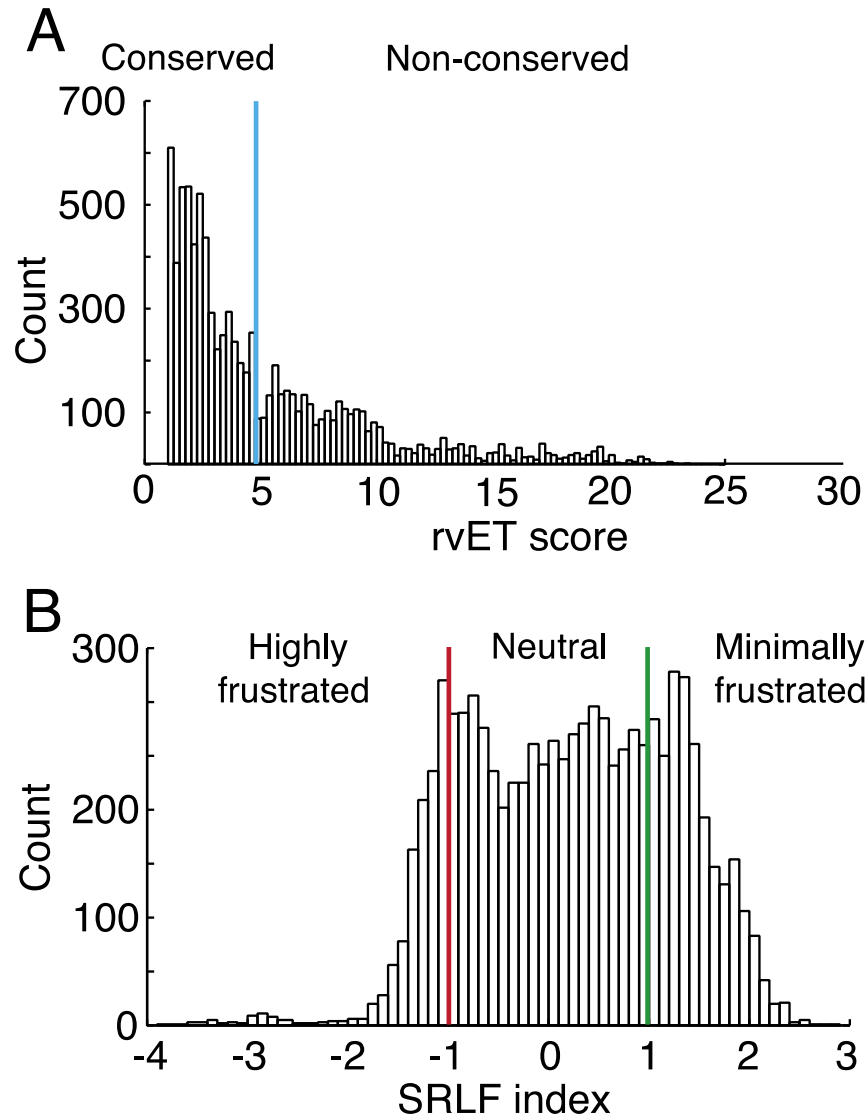

Figure S1. Distributions of evolutionary trace scores and local frustration of calmodulin (CaM) residues from 60 target bound complexes analyzed. (A) One dimensional distribution of real-value evolutionary trace (rvET) scores of all the residues of CaM. Based on the evolutionary analysis, CaM residues are divided as conserved (rvET score < 5) and non-conserved (rvET score > 5) indicated by the blue line. (B) One dimensional distribution of single residue level frustration (SRLF) indices of all the residues of CaM in the 60 complexes. Based on the local frustration analysis, CaM residues are divided as highly frustrated (SRLF index < -1, red line), minimally frustrated (SRLF index > 1, green line) and neutral (-1 < SRLF index < 1).

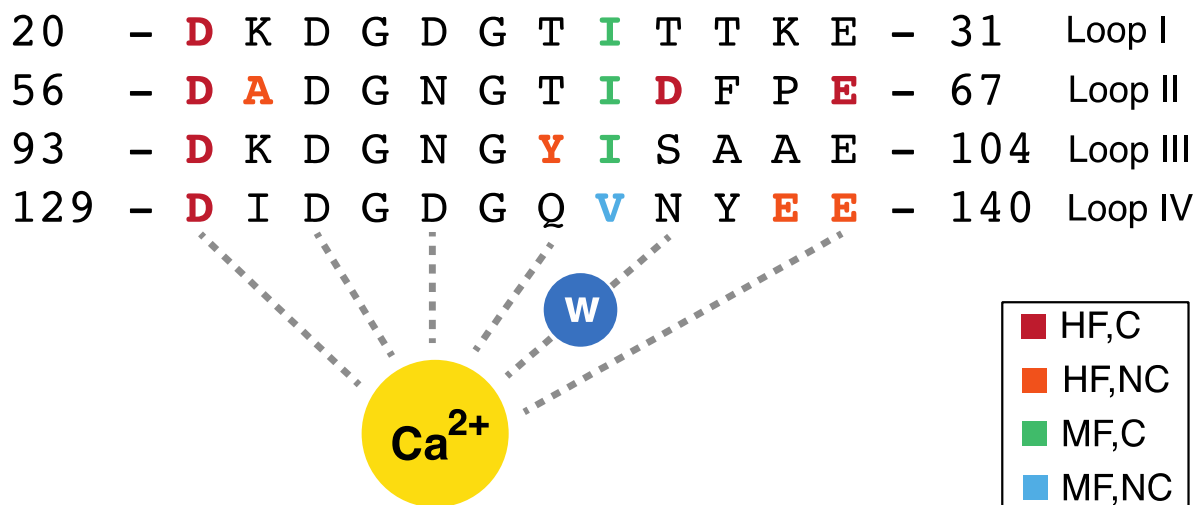

Figure S2. Sequence of the four  $\text{Ca}^{2+}$ -binding loops of CaM categorized based on the rvET score and SRLF index. The  $\text{Ca}^{2+}$  ion (shown as a yellow sphere) coordinates (indicated by grey dotted lines) with the first, third, fifth, seventh, ninth (through water molecule (w), shown as a blue sphere) and twelfth residue of the loops. The residues that fall in one of these four classes, (HF, C), (HF, NC), (MF, C) and (MF, NC) (see Table S2) are indicated by red, orange, green and blue colors, respectively and in bold letters.

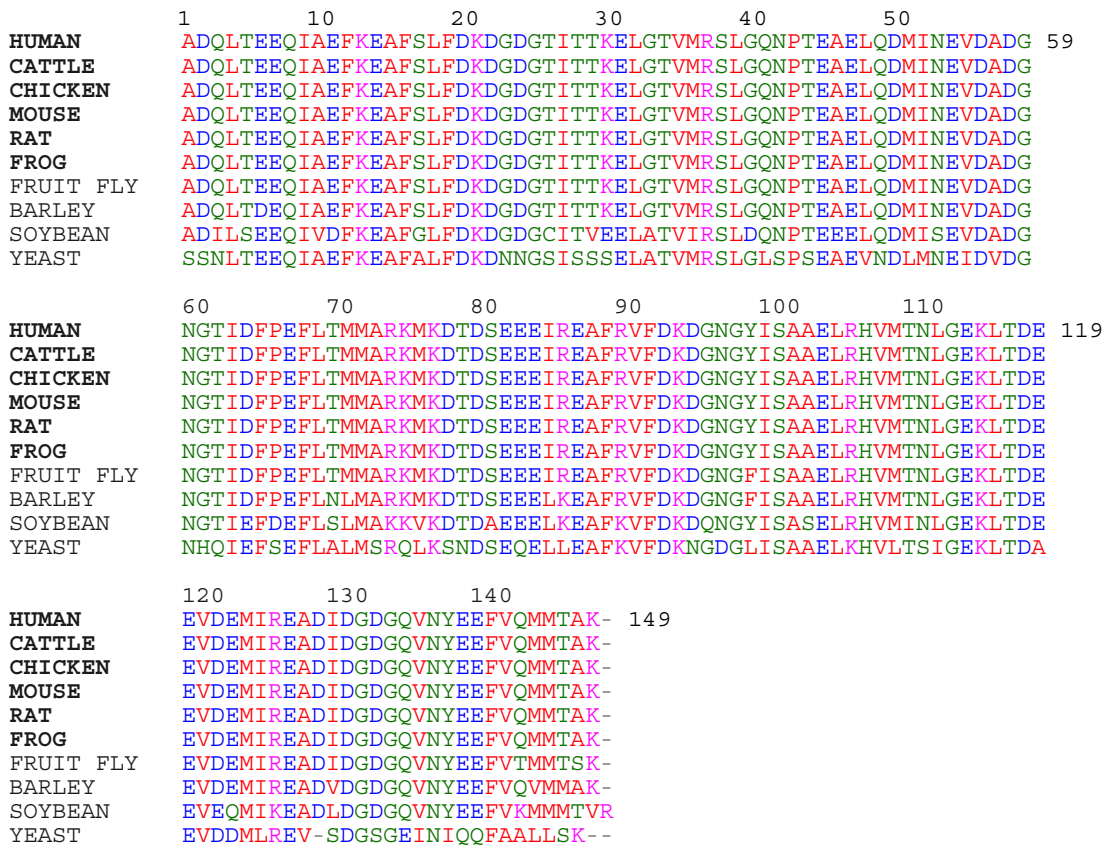

Figure S3. Multiple sequence alignment (MSA) of CaM amino acid sequences from different organisms. Our study included CaM from the following organisms (Table S1), *Homo sapiens* (human), *Bos taurus* (cattle), *Gallus gallus* (chicken), *Mus musculus* (mouse), *Rattus norvegicus* (rat), *Xenopus laevis* (frog), *Drosophila melanogaster* (fruit fly), *Hordeum vulgare* (barley), *Glycine max* (soybean) and *Saccharomyces cerevisiae* (baker’s yeast). The organisms shown in bold letters have identical CaM sequences. The positively charged residues, negatively charged residues, hydrophobic residues, and other residues are shown in magenta, blue, red and green color, respectively. MSA was performed using the ClustalW server (<http://www.ebi.ac.uk/Tools/msa/clustalw2/>).

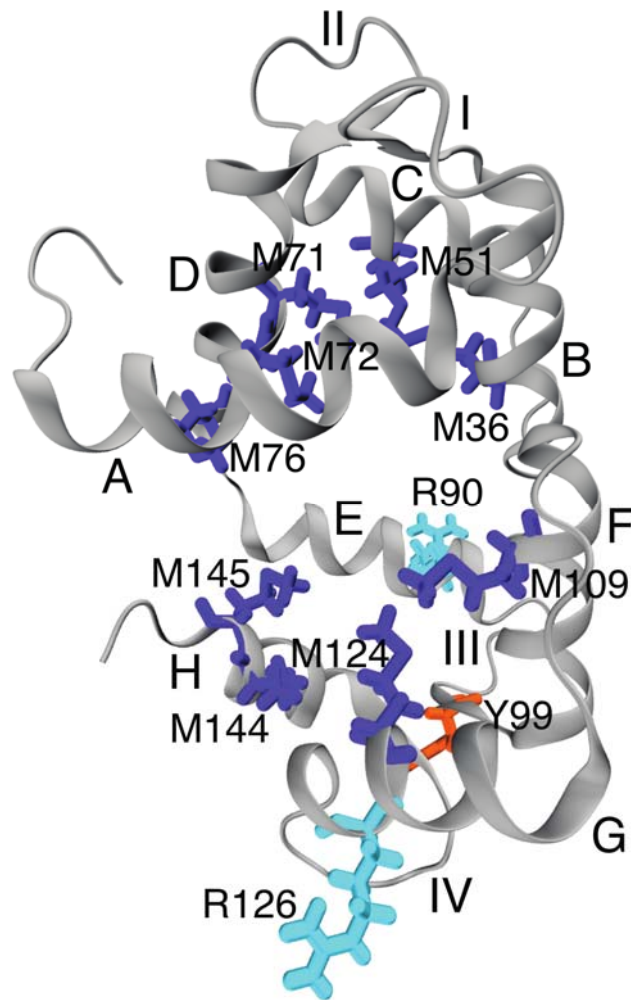

Figure S4. Structure of CaM representing the position of specific amino-acid residues analyzed in Fig. S5-S8. Tyr99 (in orange), Arg90, Arg126 (in cyan) and nine methionine residues (Met at 36, 51, 71, 72, 76, 109, 124, 144 and 145 in blue) are shown in “licorice” representation. The structure of CaM is from the CaM-CaMKI complex (PDB ID: 2L7L) and CaMKI is not shown in the above structure.

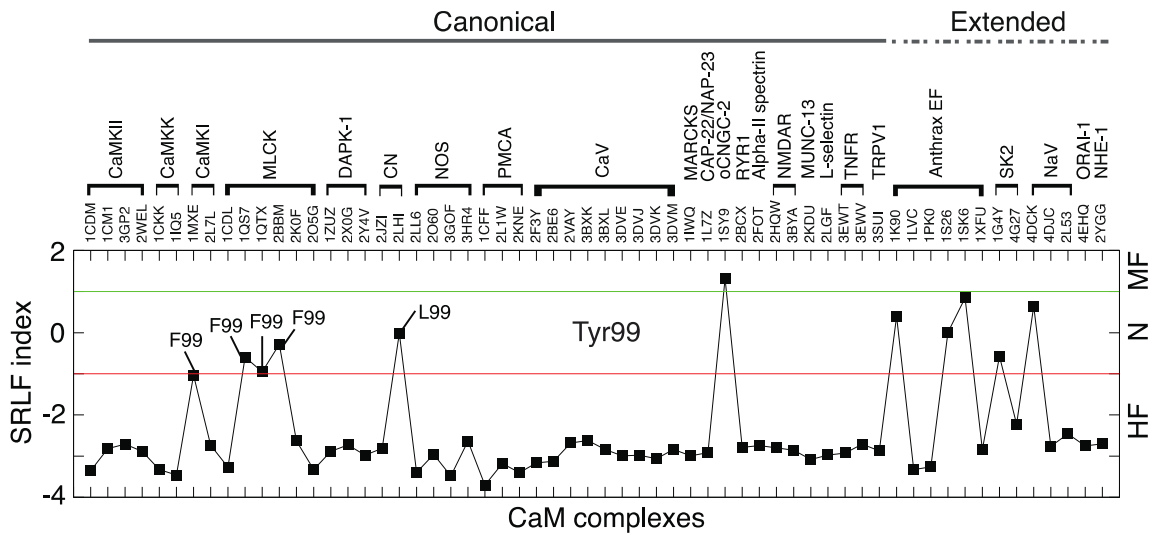

Figure S5. Single residue level frustration (SRLF) of Tyr at position 99 (of CaM) in 60 CaM complexes. The PDB codes of each complex, along with the names of the corresponding target proteins are indicated at the top panel. The binding mode of CaM is categorized as canonical or extended. Notice that the lines connecting the individual points are for visualization purposes only and are not meant to imply a connection between the individual complexes. The amino acid variation at position 99 of CaM, includes Y99/F99 in fruit fly (1MXE and 2BBM) or barley (1QS7 and 1QTX), and Y99/L99 in baker's yeast (2LHI) are indicated inside the plot. Horizontal green and red lines separate the regions into minimally frustrated (MF), neutral (N) and highly frustrated (HF). When Tyr99 is replaced with one of these hydrophobic residues the frustration index goes from high to neutral.

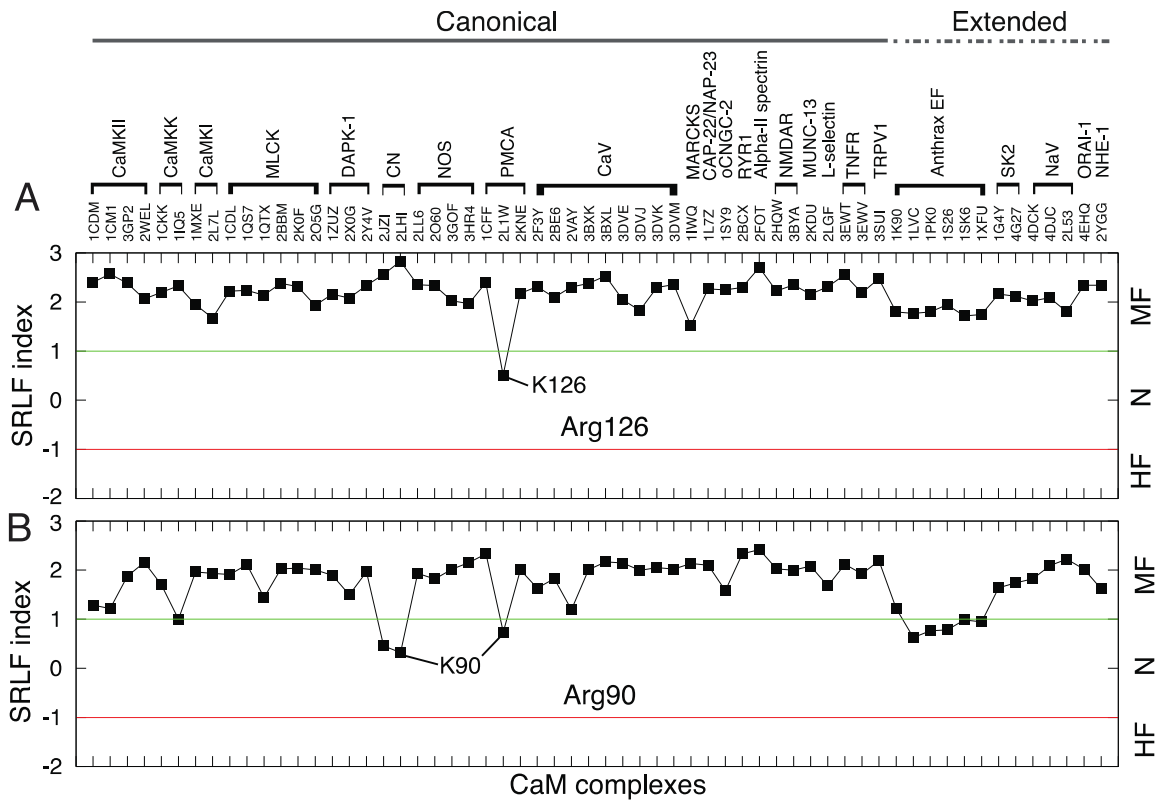

Figure S6. Single residue level frustration (SRLF) of Arg at positions 90 and 126 (of CaM) in the 60 CaM complexes. (A) SRLF of Arg126. (B) SRLF of Arg90. Notice that the lines connecting the individual points are for visual guidance only. The changes of R126/K126 in soybean (2L1W) in (A) and R90/K90 in baker's yeast (2LHI) or soybean (2L1W) in (B) produce an increase in frustration from minimal to neutral.

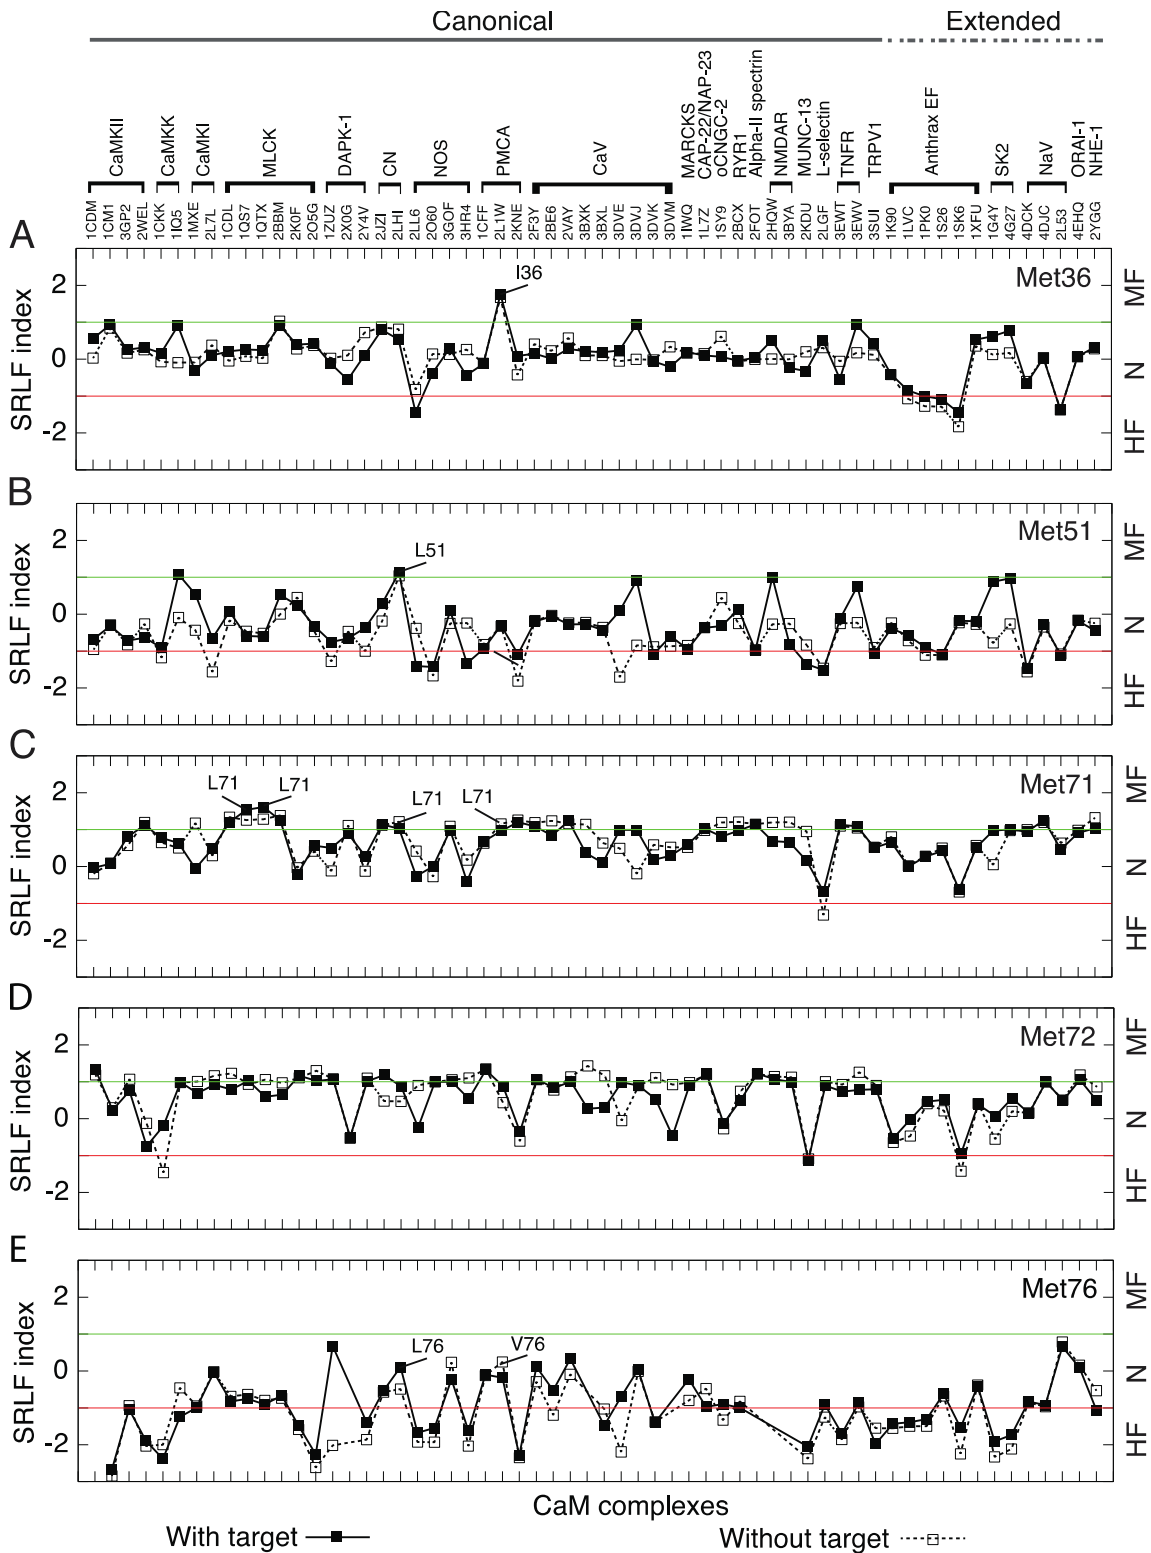

Figure S7. Single residue level frustration (SRLF) of Met residues in 60 CaM complexes. SRLF was calculated both in the presence and absence (by removing the target from the



CaM complex) of the target for each CaM complex (see *Methods* in the main text). SRLF of Met36 (A), Met51 (B), Met71 (C), Met72 (D), and Met76 (E) are shown in the respective plots. Notice that the lines connecting the individual points are for visual guidance only. The changes in Met residues of CaM, including M36/I36 (2L1W from soybean), M51/L51 (2LHI from baker's yeast), M71/L71 (1QS7 and 1QTX from barley, and 2LHI from baker's yeast and 2L1W from soybean), M76/L76 (2LHI from baker's yeast) and M76/V76 (2L1W from soybean) all lead to decreases in frustration levels (towards MF). Overall, there is little difference in the frustration level of these Met residues when calculations were made in the presence (filled symbols) or absence (unfilled symbols) of target except for Met51. In nine complexes, the frustration of Met51 decreases (SRLF index is increased by more than one standard deviation of the frustration indices) upon target binding.

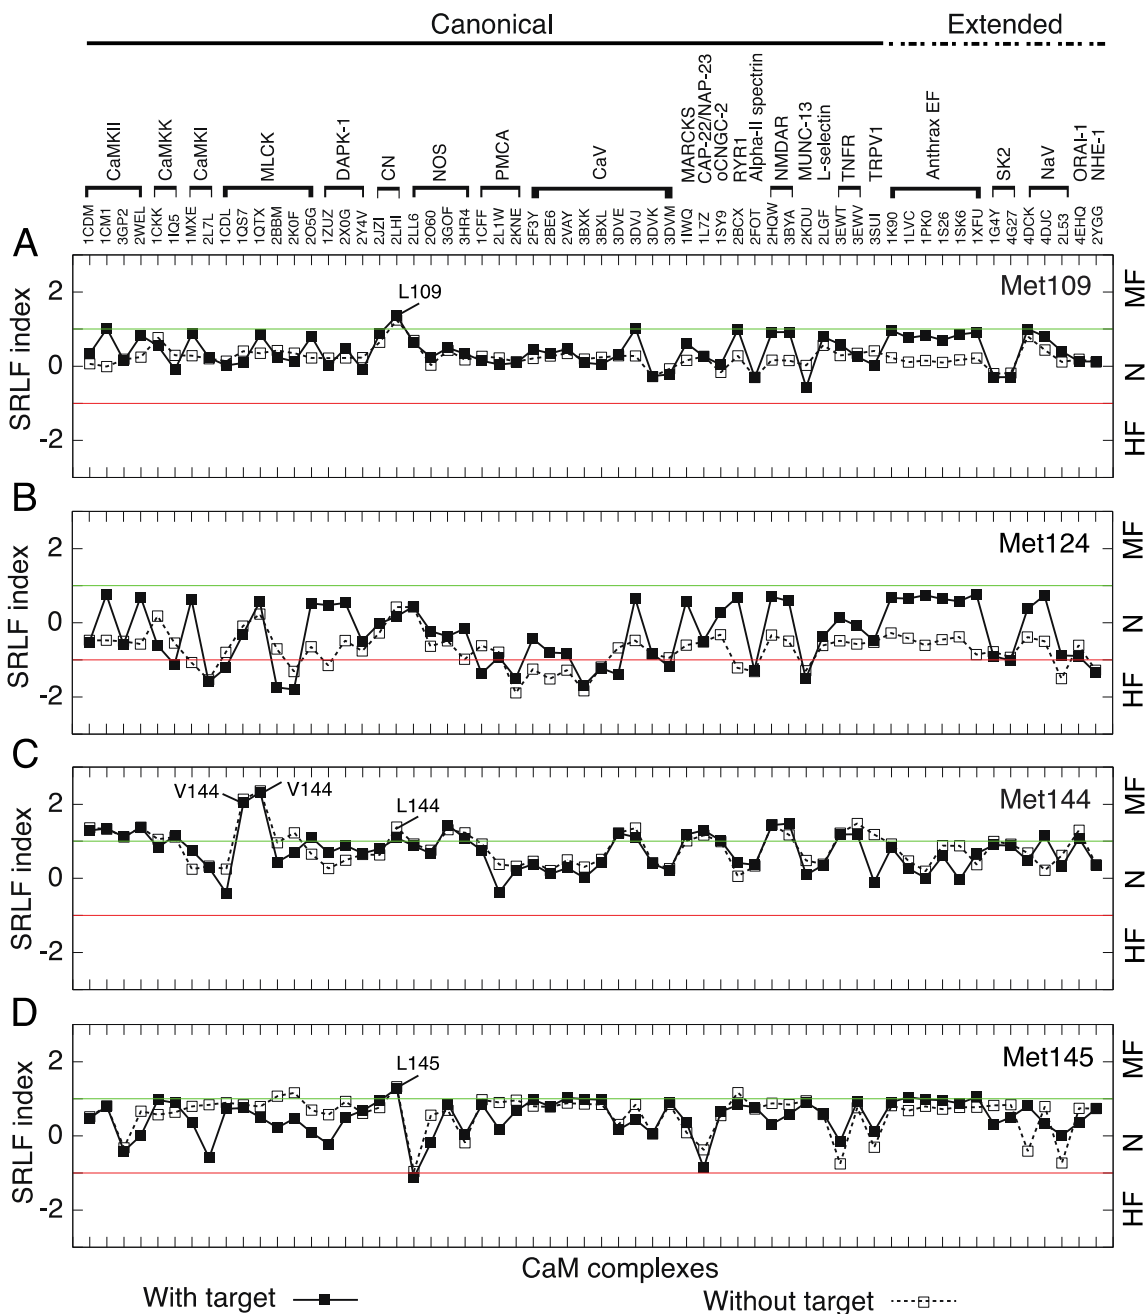

Figure S8. Single residue level frustration (SRLF) of Met residues in 60 CaM complexes. SRLF was calculated both in the presence and absence (by removing the target from the CaM complex) of the target for each CaM complex (see *Methods* in the main text). SRLF of Met109 (A), Met124 (B), Met144 (C), and Met145 (D) are shown in the respective plots. Notice that the lines connecting the individual points are for visual guidance only. The

changes in Met residues of CaM, M109/L109 (2LHI from baker's yeast), M144/V144 (1QS7 and 1QTX from barley, and 2LHI from baker's yeast), and M145/L145 (2LHI from baker's yeast) all lead to decreases in frustration index (towards MF). Overall, there is little difference in the frustration level of these Met residues when calculations were made in the presence (filled symbols) or absence (unfilled symbols) of target, except for Met124. The frustration level of Met124 significantly decreases (SRLF index is increased by more than one standard deviation of the frustration indices) in 16 complexes and increases in another 4 complexes in the presence of target.

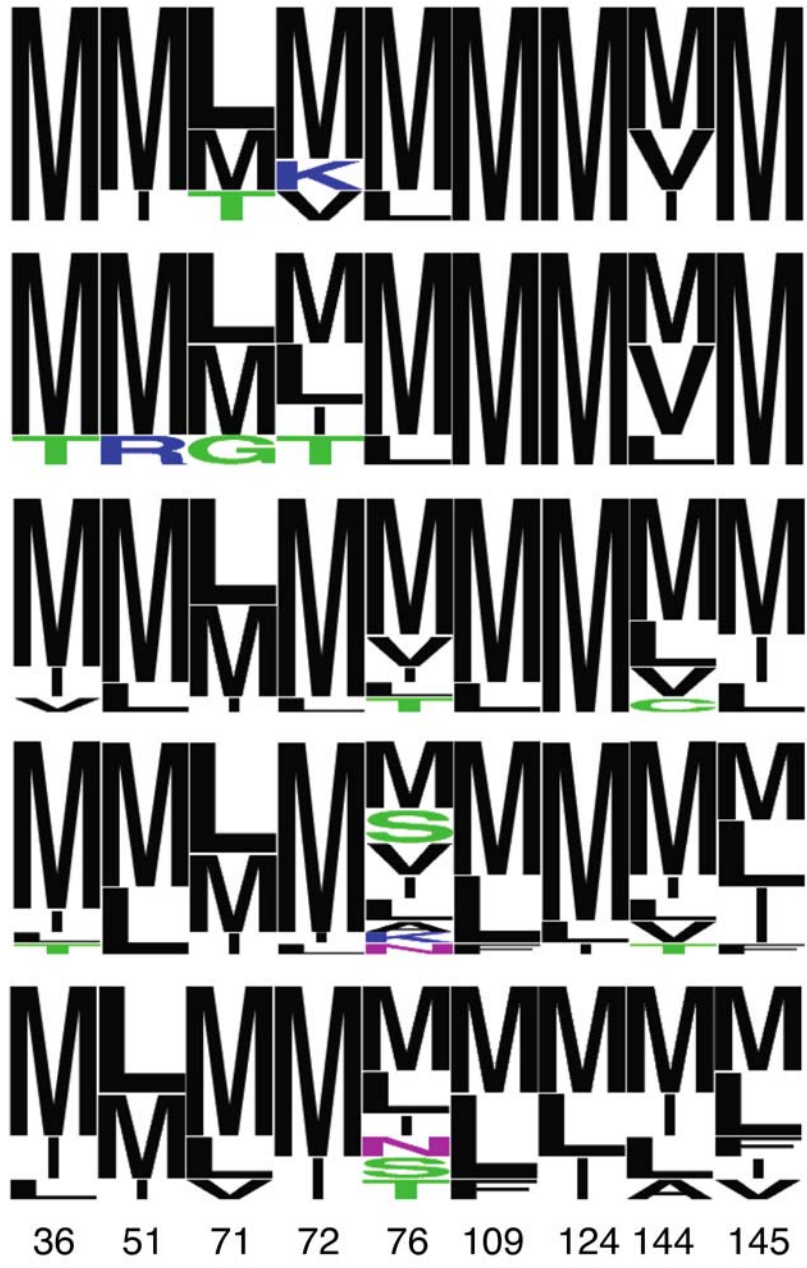

Figure S9. Variation of Met residues at the positions 36, 51, 71, 72, 76, 109, 124, 144, and 145 of CaM based on homologous CaM sequences. Homologous CaM sequences were obtained from BLAST search. All hypothetical, predicted or non-CaM protein sequences were removed from BLAST results before the sequences were subjected to multiple sequence alignment analysis. The distance between each CaM homologous sequence and human CaM was then calculated, where the distance indicates the number of amino acid substitutions as a proportion of the length of the sequence alignment (excluding gaps). The

resulting distance values range between 0 and 0.5. The homologous sequences of CaM were then grouped into five distance bins from the least (top, with distance  $< 0.1$ ) to the most (bottom, with  $0.4 < \text{distance} < 0.5$ ) divergent, according to their distances from human CaM. The sequence profiles of the nine Met residues in each distance bin were represented by the sequence logos generated from the WebLogo tool (<http://weblogo.berkeley.edu/logo.cgi>). It is noted Met124 is the most conserved Met residue in CaM and only two variants, Leu and Ile exist at this position in lower eukaryotes, whose CaM sequences include more than 40% amino acid substitutions compared to human CaM.

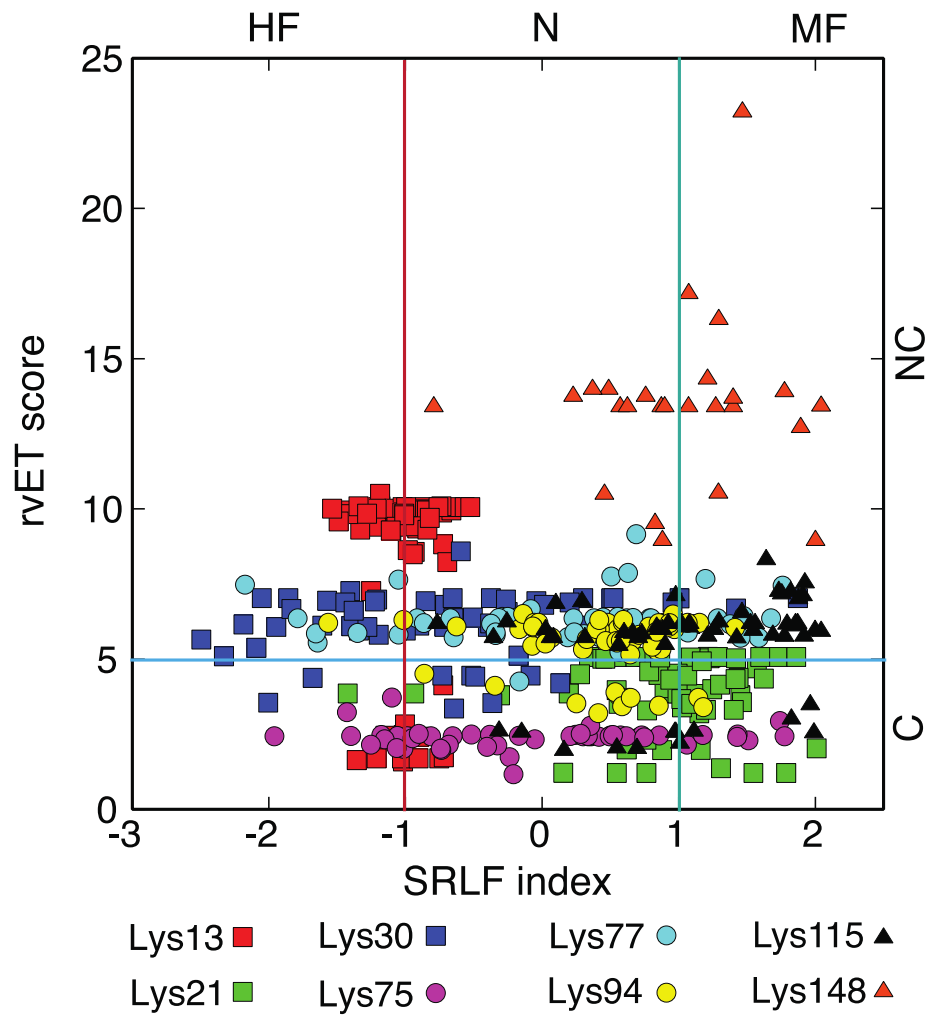

Figure S10. Evolutionary trace and local frustration of Lys residues of CaM. rvET score vs. SRLF index plot of eight Lys residues of CaM at positions 13, 21, 30, 75, 77, 94, 115, and 148 are shown.

**Table S1. List of 60 CaM-target protein complexes.**

| PDB                    | Target protein                                        | CaM organism             | Target organism          | Number of Ca <sup>2+</sup> | Method |
|------------------------|-------------------------------------------------------|--------------------------|--------------------------|----------------------------|--------|
| Canonical Binding mode |                                                       |                          |                          |                            |        |
| 1CDM                   | CaM-dependent protein kinase II                       | Bos taurus               | Bos taurus               | 4                          | X-ray  |
| 1CM1                   | CaM-dependent protein kinase II alpha                 | Bos taurus               | Bos taurus               | 4                          | X-ray  |
| 3GP2                   | CaM-kinase II delta                                   | Gallus gallus            | Homo sapiens             | 4                          | X-ray  |
| 2WEL                   | CaM-dependent protein kinase II delta                 | Homo sapiens             | Homo sapiens             | 4                          | X-ray  |
| 1CKK                   | Ca <sup>2+</sup> /CaM-dependent protein kinase kinase | Xenopus laevis           | Rattus norvegicus        | 4                          | NMR    |
| 1IQ5                   | Ca <sup>2+</sup> /CaM-dependent protein kinase kinase | Xenopus laevis           | Caenorhabditis elegans   | 4                          | X-ray  |
| 1MXE                   | CaM-dependent protein kinase I                        | Drosophila melanogaster  | Rattus norvegicus        | 4                          | X-ray  |
| 2L7L                   | CaM-kinase I alpha                                    | Homo sapiens             | Rattus norvegicus        | 4                          | NMR    |
| 1CDL                   | MLCK                                                  | Homo sapiens             | Gallus gallus            | 4                          | X-ray  |
| 1QS7                   | MLCK                                                  | Hordeum vulgare          | Gallus gallus            | 4                          | X-ray  |
| 1QTX                   | MLCK                                                  | Hordeum vulgare          | Gallus gallus            | 4                          | X-ray  |
| 2BBM                   | MLCK                                                  | Drosophila melanogaster  | Oryctolagus cuniculus    | 4                          | NMR    |
| 2K0F                   | MLCK                                                  | Homo sapiens             | Homo sapiens             | 4                          | NMR    |
| 2O5G                   | MLCK                                                  | Gallus gallus            | Gallus gallus            | 4                          | NMR    |
| 1ZUZ                   | DAPK-1                                                | Homo sapiens             | Homo sapiens             | 4                          | X-ray  |
| 2Y4V                   | DAPK-1                                                | Homo sapiens             | Homo sapiens             | 4                          | X-ray  |
| 2JZI                   | Calcineurin A alpha                                   | Homo sapiens             | Homo sapiens             | 4                          | NMR    |
| 2LHI                   | Calcineurin A1                                        | Saccharomyces cerevisiae | Saccharomyces cerevisiae | 3                          | NMR    |
| 2LL6                   | NOS                                                   | Homo sapiens             | Homo sapiens             | 0                          | NMR    |
| 2O60                   | NOS                                                   | Gallus gallus            | Mus musculus             | 4                          | X-ray  |
| 3GOF                   | NOS                                                   | Gallus gallus            | Mus musculus             | 4                          | X-ray  |
| 3HR4                   | NOS                                                   | Homo sapiens             | Homo sapiens             | 4                          | X-ray  |

---

|      |                                               |                   |                       |   |       |
|------|-----------------------------------------------|-------------------|-----------------------|---|-------|
| 1CFF | PMCA                                          | Xenopus laevis    | Homo sapiens          | 4 | NMR   |
| 2L1W | Vacuolar Ca <sup>2+</sup> -ATPase             | Glycine max       | Glycine max           | 4 | NMR   |
| 2KNE | PMCA4                                         | Homo sapiens      | Homo sapiens          | 4 | NMR   |
| 2F3Y | CaV1.2 (IQ-motif)                             | Homo sapiens      | Cavia porcellus       | 4 | X-ray |
| 2BE6 | CaV1.2 (IQ-domain)                            | Homo sapiens      | Homo sapiens          | 4 | X-ray |
| 2VAY | CaV1.1 (IQ-domain)                            | Homo sapiens      | Homo sapiens          | 4 | X-ray |
| 3BXK | CaV2.1                                        | Rattus norvegicus | Homo sapiens          | 4 | X-ray |
| 3BXL | CaV2.3                                        | Rattus norvegicus | Homo sapiens          | 4 | X-ray |
| 3DVE | CaV2.2                                        | Homo sapiens      | Oryctolagus cuniculus | 4 | X-ray |
| 3DVJ | CaV2.2                                        | Homo sapiens      | Oryctolagus cuniculus | 4 | X-ray |
| 3DVK | CaV2.3                                        | Homo sapiens      | Rattus norvegicus     | 4 | X-ray |
| 3DVM | CaV2.1                                        | Homo sapiens      | Oryctolagus cuniculus | 4 | X-ray |
| 1IWQ | Myristoylated alanine-rich C-kinase substrate | Homo sapiens      | Mus musculus          | 4 | X-ray |
| 1L7Z | CAP-22/NAP-23                                 | Homo sapiens      | Homo sapiens          | 4 | X-ray |
| 1SY9 | Olfactory CNG channel 2                       | Xenopus laevis    | Bos taurus            | 4 | NMR   |
| 2BCX | Ryanodine receptor 1                          | Gallus gallus     | Oryctolagus cuniculus | 4 | X-ray |
| 2FOT | Alpha-II spectrin                             | Bos taurus        | Homo sapiens          | 4 | X-ray |
| 2HQW | NMDA receptor                                 | Rattus norvegicus | Homo sapiens          | 4 | X-ray |
| 3BYA | NMDA receptor                                 | Homo sapiens      | Homo sapiens          | 4 | X-ray |
| 2KDU | MUNC-13                                       | Xenopus laevis    | Rattus norvegicus     | 4 | NMR   |
| 2LGF | I-selectin                                    | Homo sapiens      | Homo sapiens          | 4 | NMR   |
| 3EWT | Tumour necrosis factor receptor 6             | Homo sapiens      | Homo sapiens          | 4 | X-ray |
| 3EWW | Tumour necrosis factor 16 receptor            | Homo sapiens      | Homo sapiens          | 4 | X-ray |
| 3SUI | TRP channel (TRPV1)                           | Homo sapiens      | Rattus norvegicus     | 4 | X-ray |

---



---

Extended Binding Mode

|      |                                                     |                   |                    |   |       |
|------|-----------------------------------------------------|-------------------|--------------------|---|-------|
| 1K90 | Anthrax EF                                          | Homo sapiens      | Bacillus anthracis | 2 | X-ray |
| 1LVC | Anthrax EF                                          | Homo sapiens      | Bacillus anthracis | 2 | X-ray |
| 1PK0 | Anthrax EF                                          | Homo sapiens      | Bacillus anthracis | 2 | X-ray |
| 1S26 | Anthrax EF                                          | Homo sapiens      | Bacillus anthracis | 2 | X-ray |
| 1SK6 | Anthrax EF                                          | Homo sapiens      | Bacillus anthracis | 2 | X-ray |
| 1XFU | Anthrax EF                                          | Homo sapiens      | Bacillus anthracis | 3 | X-ray |
| 1G4Y | SK2                                                 | Rattus norvegicus | Rattus norvegicus  | 2 | X-ray |
| 4G27 | SK2                                                 | Rattus norvegicus | Rattus norvegicus  | 2 | X-ray |
| 4DCK | NaV1.5 (+FGF13)                                     | Homo sapiens      | Homo sapiens       | 0 | X-ray |
| 4DJC | NaV1.5                                              | Homo sapiens      | Homo sapiens       | 4 | X-ray |
| 2L53 | NaV1.5 (IQ-motif)                                   | Homo sapiens      | Homo sapiens       | 0 | NMR   |
| 4EHQ | ORAI-1                                              | Rattus norvegicus | Homo sapiens       | 4 | X-ray |
| 2YGG | Na <sup>+</sup> /H <sup>+</sup> -exchanger<br>NHE-1 | Rattus norvegicus | Homo sapiens       | 4 | X-ray |

---

**Table S2. Classification of Calmodulin residues.** Each residue of CaM was categorized into one of six classes based on both its degree of conservation (conserved (C) or non-conserved (NC)) and its frustration level (highly frustrated (HF), neutral (N) or minimally frustrated (MF). in different CaM-target complexes. A residue had to be found in at least 60% of the complexes to be designated as belonging to one of the classes.

| Classes                 | CaM Residues                                                                                                                                                                                                                                             |
|-------------------------|----------------------------------------------------------------------------------------------------------------------------------------------------------------------------------------------------------------------------------------------------------|
| HF, C<br>(7 residues)   | D20, D56, D64, E67, D93, E123, D129                                                                                                                                                                                                                      |
| N, C<br>(47 residues)   | A15, D22, D24, G25, T28, T29, G33, M36, R37, S38, G40, Q41, N42, E45, E47, D50, M51, E54, D58, N60, G61, M72, A73, K75, D80, E82, E83, E84, A88, F92, D95, N97, S101, E104, R106, H107, M109, G113, E114, E120, M124, E127, A128, D131, G132, D133, G134 |
| MF, C<br>(20 residues)  | F16, L18, F19, I27, L32, T34, V35, L39, L48, I52, V55, I63, F68, L69, V91, I100, L105, L112, L116, V121                                                                                                                                                  |
| HF, NC<br>(5 residues)  | A57, Y99, E119, E139, E140                                                                                                                                                                                                                               |
| N, NC<br>(33 residues)  | E6, E7, Q8, A10, E11, S17, G23, T26, T44, A46, Q49, N53, G59, T62, T70, M71, R74, T79, S81, K94, A103, T110, T117, D118, D122, I130, Q135, N137, Y138, Q143, M144, M145, T146                                                                            |
| MF, NC<br>(12 residues) | L4, T5, I9, F12, I85, R90, V108, I125, R126, V136, F141, V142                                                                                                                                                                                            |
